# Supplementary material for: Novel time-temperature and ‘consume-within’ indicator based on gas-diffusion
Source: Royal Society of Chemistry journal article supplement (doi:10.1039/c6cc07906g), 2016-01-01
Supplement: c6cc07906g1.pdf [file c6cc07906g1.pdf]

### Electronic Supplementary Information (ESI)

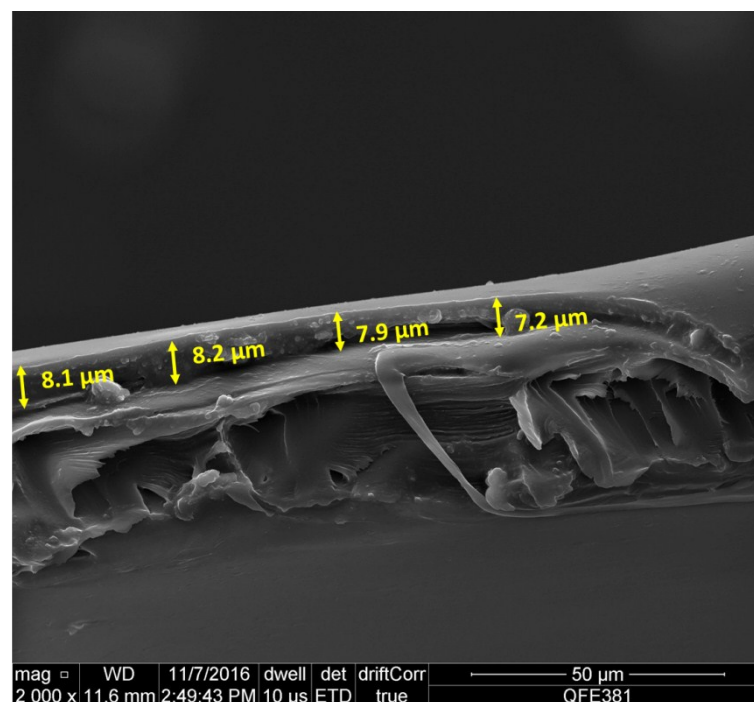

**Figure S1:** SEM image of the dried indicator film, with a thickness of ca. 8 microns

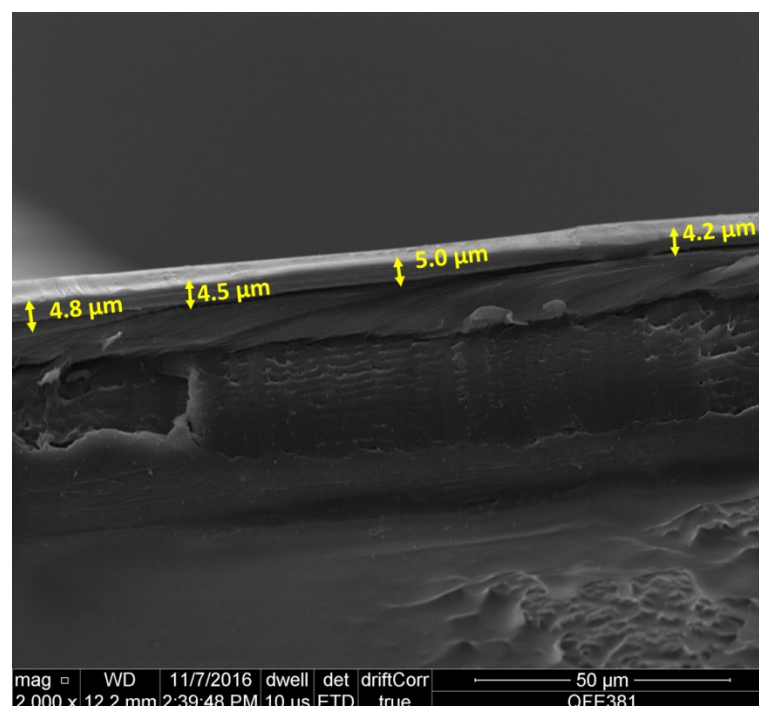

**Figure S2:** SEM image of the dried ammonia-generating adhesive film, with a thickness of ca. 5 microns
